# Supplementary material for: The long intergenic noncoding RNA GAS5 reduces cisplatin-resistance in non-small cell lung cancer through the miR-217/LHPP axis
Source: PubMed Central journal article supplement (PMC7880381; doi:10.18632/aging.202352), 2021-01-08
Supplement: aging-13-202352-s001.pdf [file aging-13-202352-s001.pdf]

SUPPLEMENTARY FIGURES

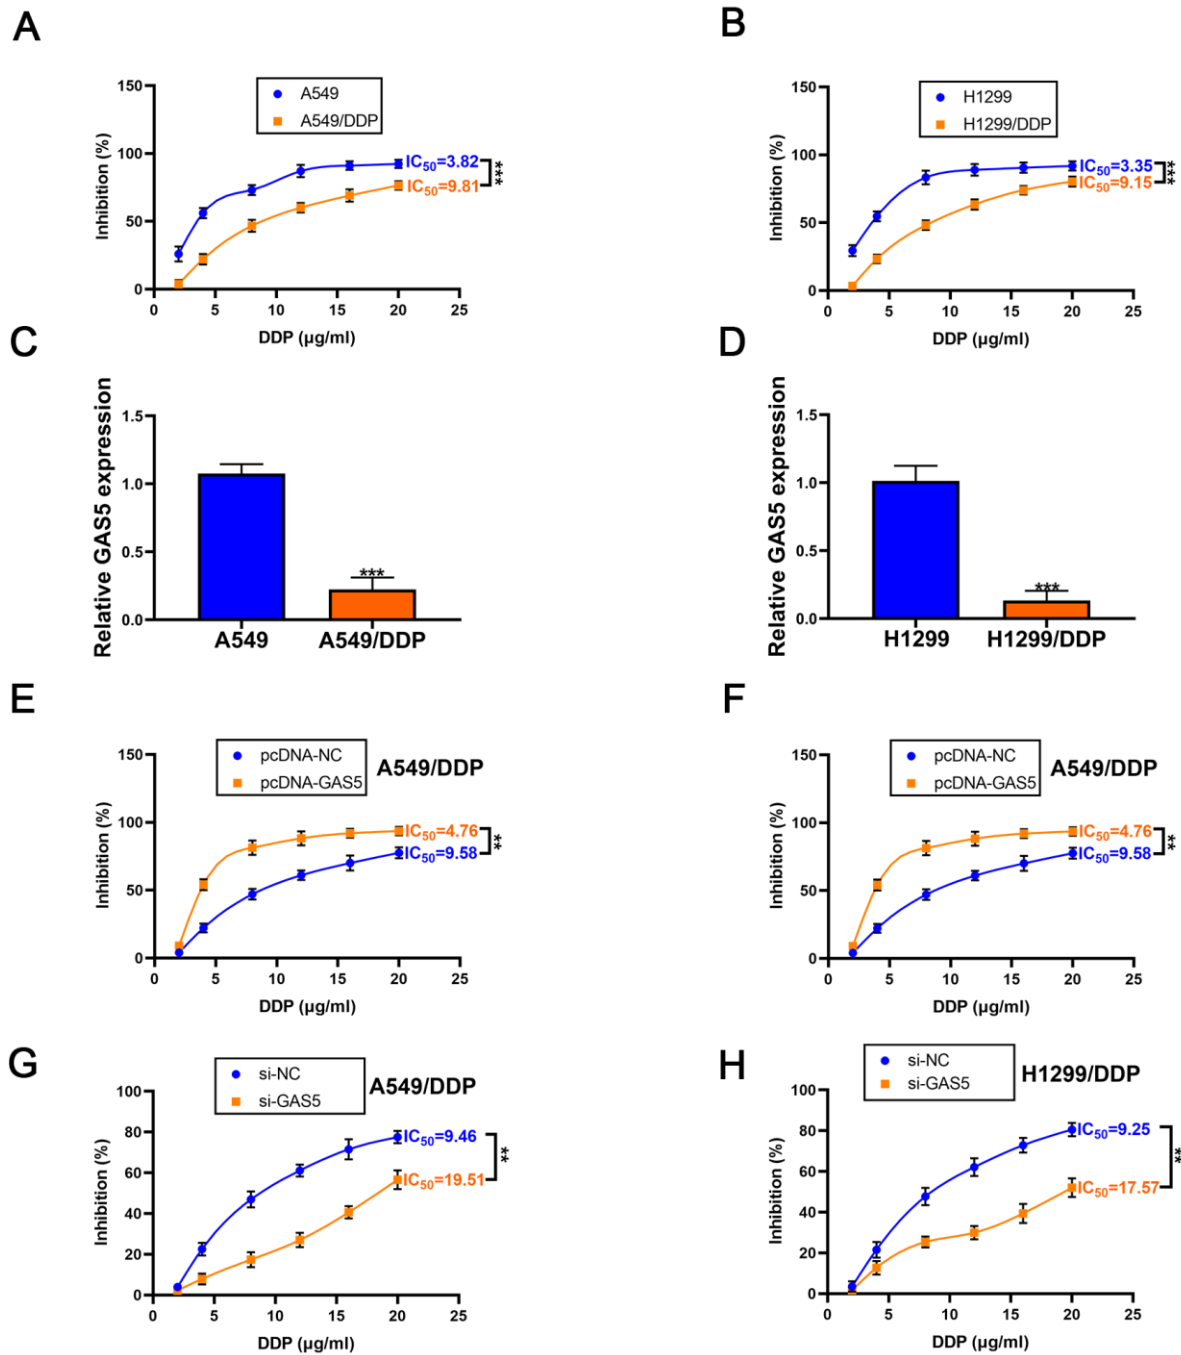

**Supplementary Figure 1. LncRNA GAS5 is involved in cisplatin-resistance of NSCLC cells.** (A, B) The sensitivities of cisplatin-resistant NSCLC cells and their parental cells with cisplatin were determined by CCK-8 assays. (C, D) LncRNA GAS5 expression was detected by qRT-PCR in A549/DDP cells and H1299/DDP cells. (E–H) The sensitivities of Dox-resistant NSCLC cells under different treatments with Dox were determined by CCK-8 assay. \*p<0.05, \*\*p<0.01, \*\*\*p<0.001. Cisplatin-resistant cultures were performed over two months and other experiments were performed at least three times within one week.

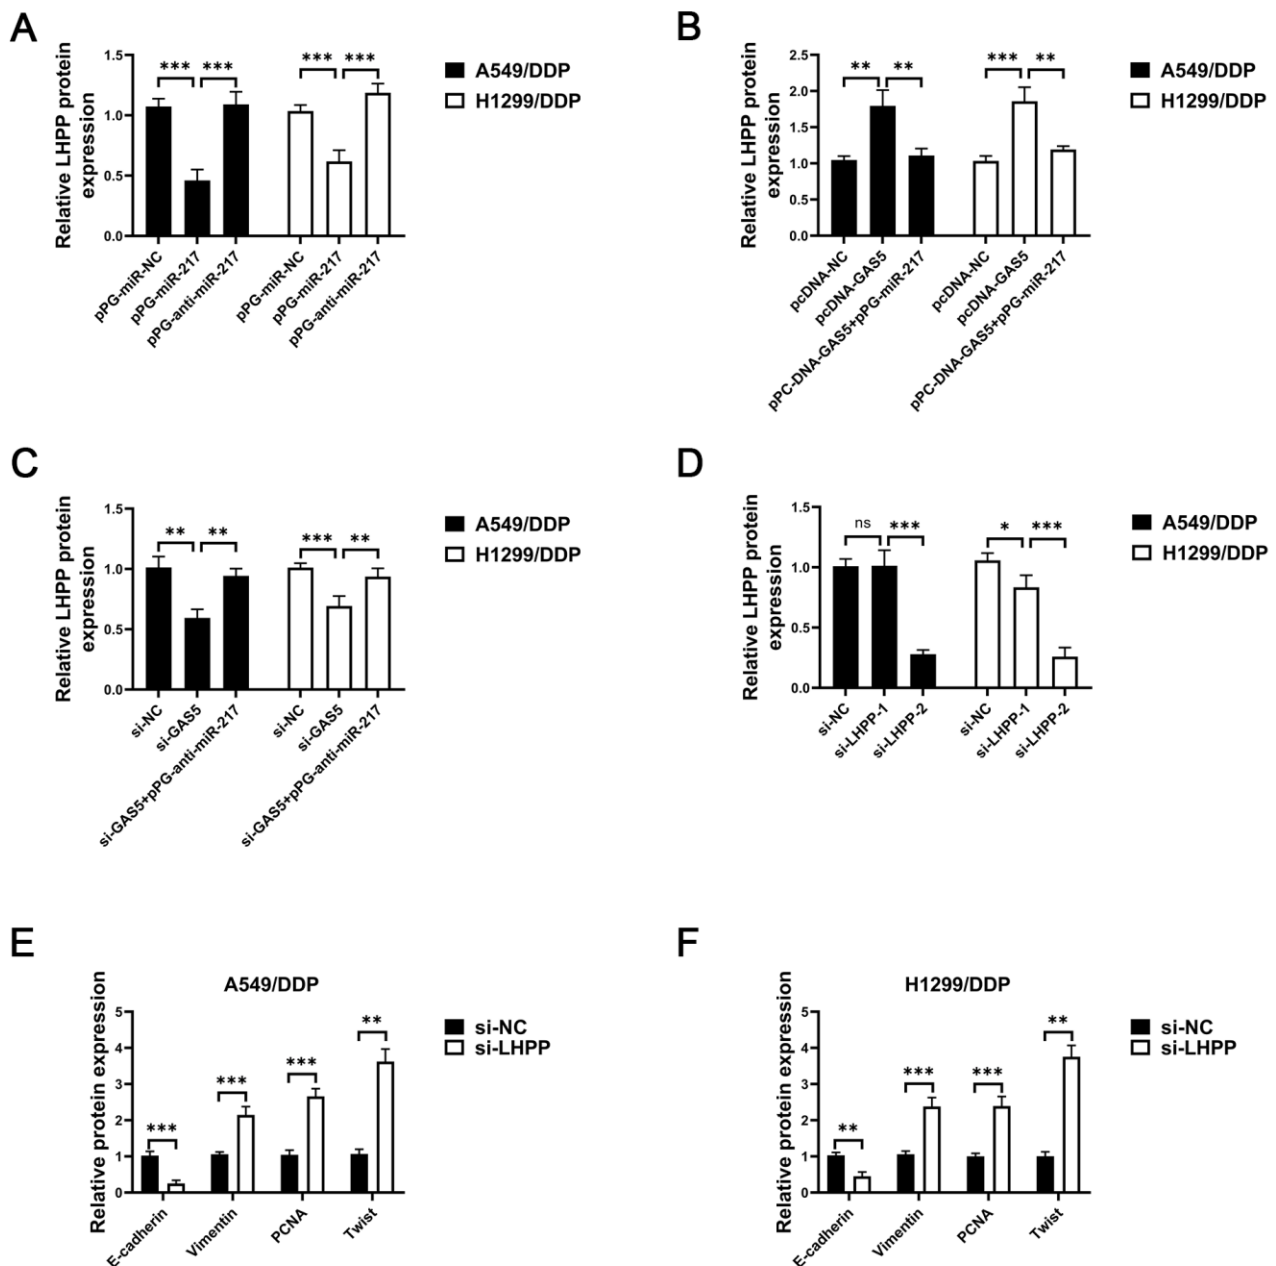

**Supplementary Figure 2. Protein bands are quantitated and normalized against their internal controls. (A)** Quantitative analysis of LHPP protein expression in A549/DDP and H1299/DDP cells transfected with pPG-miR-NC, pPG-miR-217 or pPG-anti-miR-217. **(B)** Quantitative analysis of LHPP protein expression in A549/DDP and H1299/DDP cells transfected with pcDNA-NC, pcDNA-GAS5 or pcDNA-GAS5 + pPG-miR-217. **(C)** Quantitative analysis for LHPP protein expression in A549/DDP and H1299/DDP cells transfected with si-NC, si-GAS5 or si-GAS5 + pPG-anti-miR-217. **(D)** Quantitative analysis for LHPP protein expression in A549/DDP and H1299/DDP cells transfected with si-NC, si-GAS5-1 or si-GAS5-2. **(E, F)** Quantitative analysis for E-cadherin, Vimentin, PCNA, Twist protein expression in A549/DDP and H1299/DDP cells transfected with si-NC or si-LHPP. \* $p < 0.05$ , \*\* $p < 0.01$ , \*\*\* $p < 0.001$ .

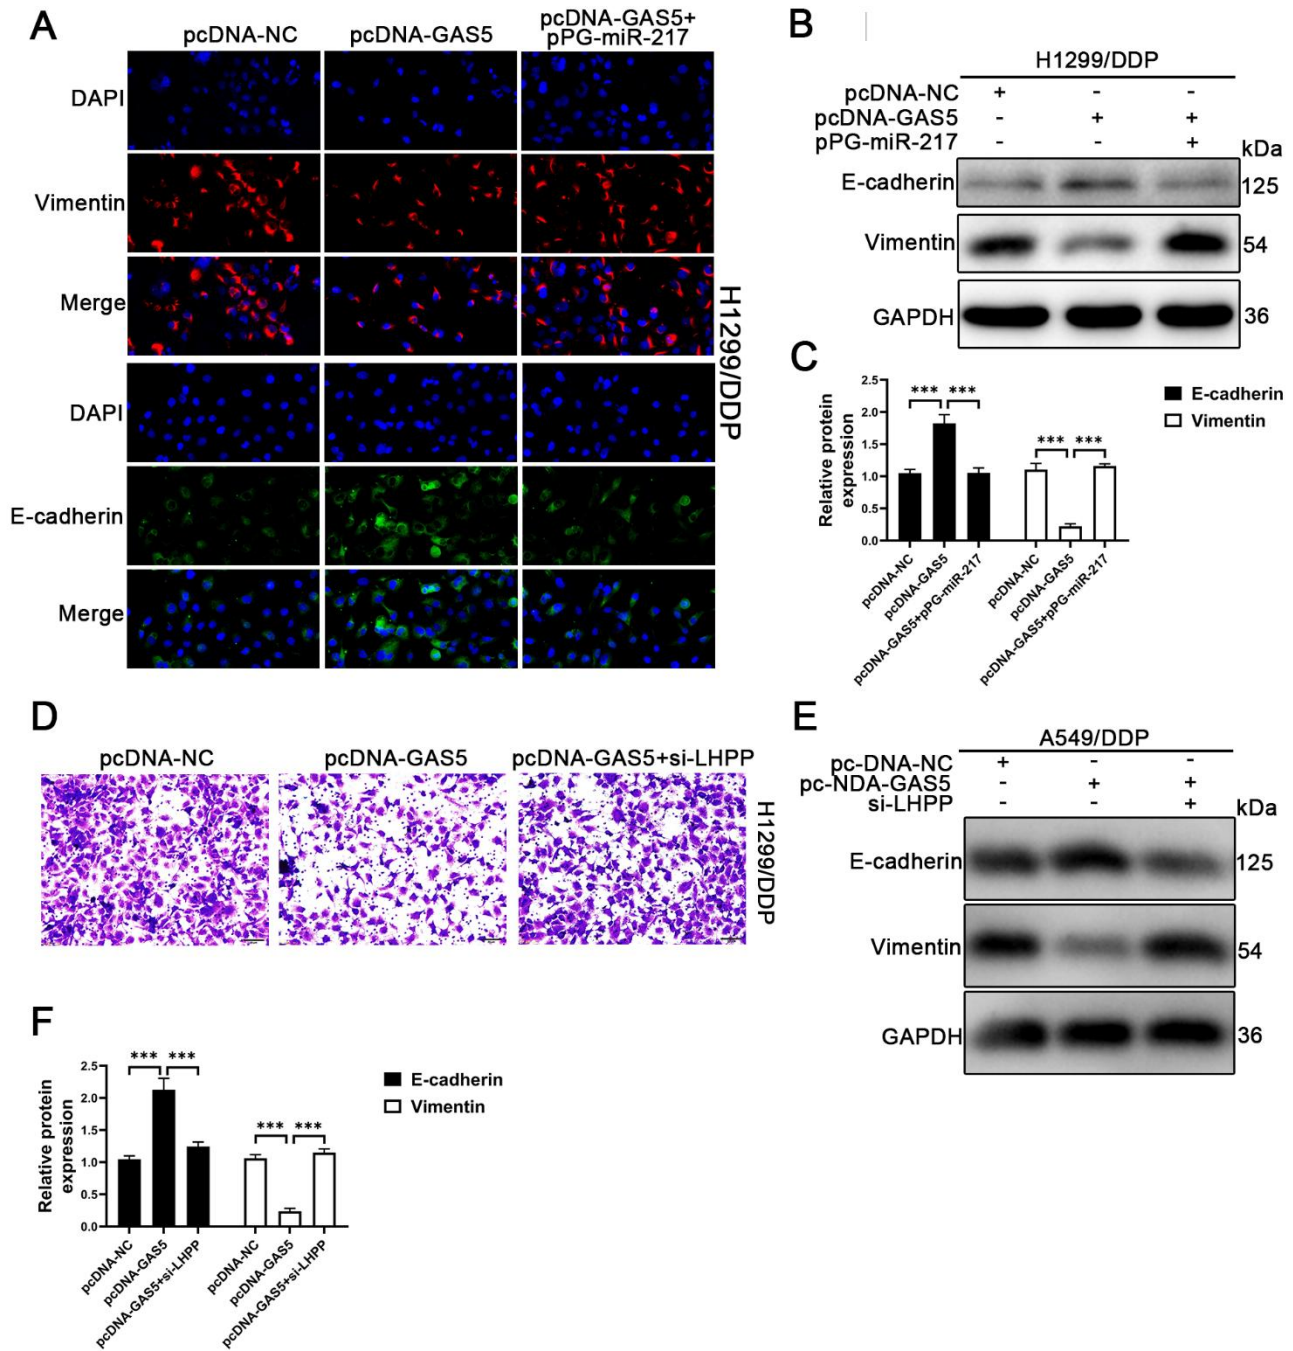

**Supplementary Figure 3. Upregulation of GAS5 inhibits NSCLC cell EMT progression.** (A) E-cadherin and Vimentin expression levels in H1299/DDP transfected with pcDNA-NC, pcDNA-GAS5 or pcDNA-GAS5 + pPG + pPG-miR-217 were detected by immunofluorescence. (B) The protein levels of E-cadherin and Vimentin in H1299/DDP cells transfected with pcDNA-NC, pcDNA-GAS5 or pcDNA-GAS5 + pPG-miR-217 were detected by Western blotting. (C) Quantitative analysis of E-cadherin and Vimentin protein expression in A549/DDP and H1299/DDP cells transfected with pcDNA-NC, pcDNA-GAS5 or pcDNA-GAS5 + pPG-miR-217. (D) The invasion of A549/DDP cells transfected with pcDNA-NC, pcDNA- lncRNA GAS5 or pcDNA-GAS5 + si-LHPP were determined by transwell assay. (E) The protein levels of E-cadherin and Vimentin in H1299/DDP transfected with pcDNA-NC, pcDNA-GAS5 or pcDNA-GAS5 + si-LHPP were detected by Western blotting. (F) Quantitative analysis of E-cadherin and Vimentin protein expression in A549/DDP and H1299/DDP cells transfected with pcDNA-NC, pcDNA-GAS5 or pcDNA-GAS5 + si-GAS5. \* $p < 0.05$ , \*\* $p < 0.01$ , \*\*\* $p < 0.001$ . All experiments were performed at least three times.
